# Supplementary material for: Molecular Mechanism of colorectal cancer occurrence and Development based on the mechanism of butyrate metabolism related genes
Source: Research Square preprint supplement (doi:10.21203/rs.3.rs-3679613/v1), 2023-12-08
Supplement: Supplementary file 1 [file ff68a2ac41441a13abb4a63f.docx]

**Supplementary Material**

Additional file 1


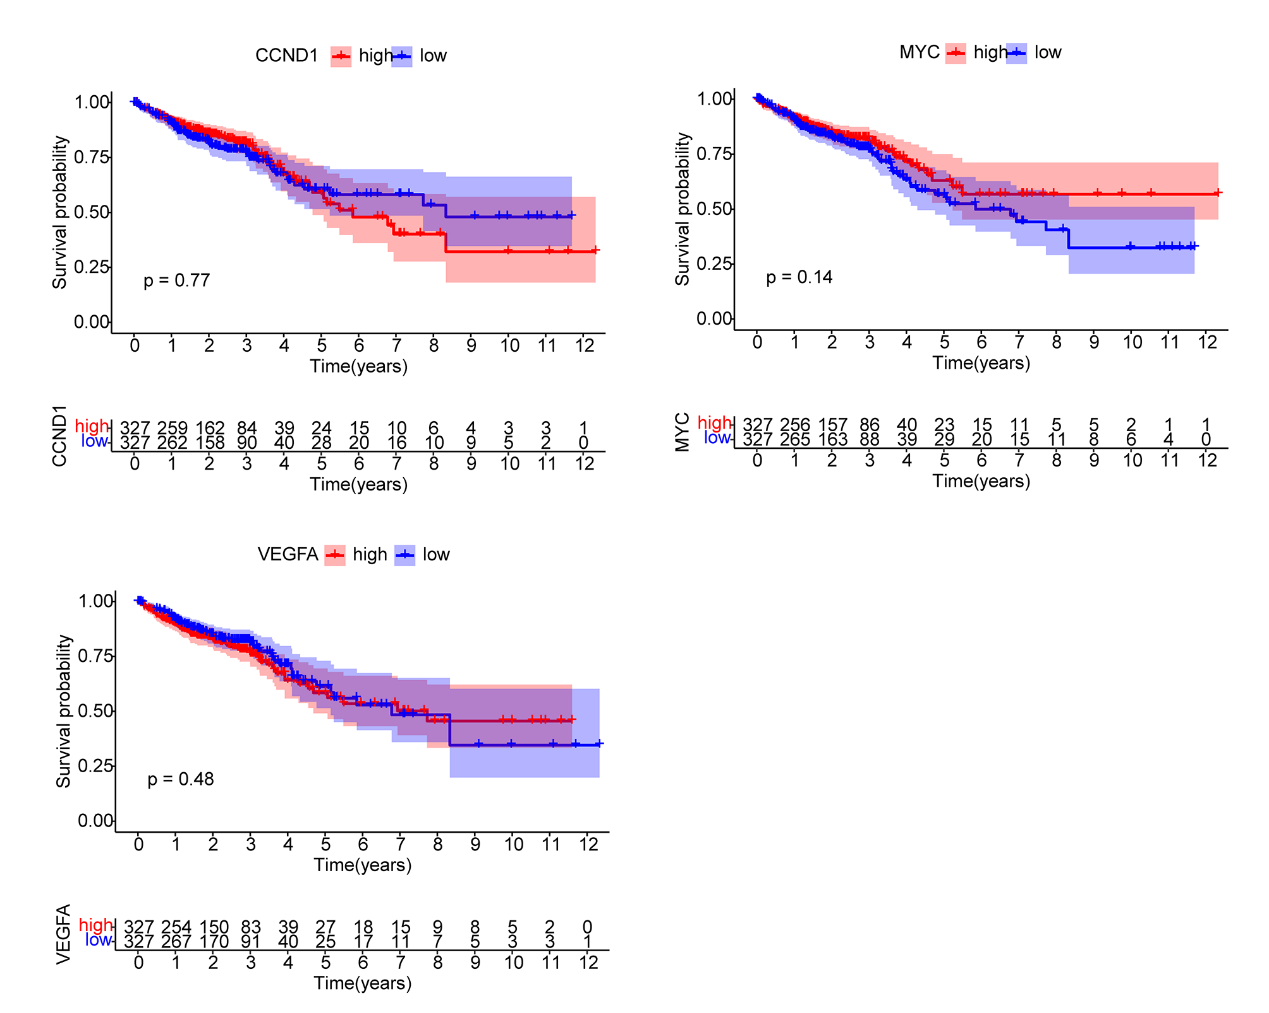


**Fig.S1** Survival analysis of biomarkers. Kaplan-Meier curves for the overall survival (OS) of patients in the high-expression group and low-expression group with biomarkers *CCND1*, *MYC*, *VEGFA*.

**Additional file 2**

**Supplementary Tables 1** 882butyrate metabolism-related genes (BMGs) in the GeneCards database

| **Gene Symbol** |
| --- |
| CYP2D6 |
| MTR |
| INS |
| CYP3A4 |
| CYP2C19 |
| PPARG |
| ACADM |
| LEP |
| MTRR |
| MTHFR |
| SFTPC |
| ADIPOQ |
| APOB |
| TNF |
| LDLR |
| APOE |
| TP53 |
| LPL |
| CYP2C9 |
| LIPC |
| OTC |
| IL6 |
| PPARA |
| CBS |
| CYP1A2 |
| CYP2A6 |
| CYP2E1 |
| ALB |
| CYP2C8 |
| GHRL |
| CYP2B6 |
| UGT1A1 |
| ETFDH |
| VDR |
| MTTP |
| ETFA |
| APOA1 |
| IGF1 |
| ABAT |
| AKT1 |
| GGT1 |
| MMUT |
| ALDH5A1 |
| SLC16A1 |
| GCK |
| CYP3A5 |
| SLC2A1 |
| GCDH |
| FLAD1 |
| GSTP1 |
| CRP |
| ACADS |
| INSR |
| HNF4A |
| GCG |
| ETFB |
| CES1 |
| LCAT |
| CETP |
| ALDH2 |
| GSTM1 |
| HMGCL |
| BGLAP |
| ACADVL |
| GPT |
| CPT1A |
| HIF1A |
| APOC3 |
| RETN |
| HADHA |
| ACE |
| CYP1B1 |
| CD36 |
| LMNA |
| CPT2 |
| POMC |
| HSD11B1 |
| XDH |
| NR3C1 |
| PRODH |
| CYP27B1 |
| ABCA1 |
| IRS1 |
| ADSL |
| MAT1A |
| GALT |
| MYC |
| GSTT1 |
| CYP19A1 |
| G6PC1 |
| BCHE |
| PON1 |
| HSD11B2 |
| PC |
| DHFR |
| NR1H2 |
| HMGCR |
| SERPINE1 |
| SLC25A13 |
| PCSK9 |
| PPARD |
| MTHFD1 |
| CYP17A1 |
| SIRT1 |
| ABCB1 |
| AHCY |
| CA5A |
| IL1B |
| ACSM1 |
| LDHA |
| ESR1 |
| PTEN |
| BCL2 |
| NOS3 |
| SHBG |
| NAT2 |
| CASR |
| PTGS2 |
| COMT |
| HSD17B10 |
| PNPO |
| TCF7L2 |
| DPP4 |
| ALDH6A1 |
| HBB |
| MAPK1 |
| APOA5 |
| PTH |
| SREBF1 |
| HADH |
| CTH |
| TF |
| TAT |
| SLC2A2 |
| BCKDHB |
| HDAC9 |
| TYMS |
| HPRT1 |
| ACSM2B |
| SLC19A1 |
| IVD |
| LIPE |
| SLC17A5 |
| PRKAA1 |
| CP |
| POLG |
| PDHA1 |
| OGDH |
| SMPD1 |
| MLYCD |
| G6PD |
| CAT |
| NR1I2 |
| GATM |
| POR |
| FAH |
| SLCO1B1 |
| EPO |
| CPS1 |
| UCP2 |
| FASN |
| ALDH9A1 |
| ADA |
| ASS1 |
| BMP6 |
| CNR1 |
| GSS |
| TGFB1 |
| GLDC |
| ACSM3 |
| SOD1 |
| IFNG |
| AR |
| MPO |
| APOA2 |
| HADHB |
| CCL2 |
| CASP3 |
| SUOX |
| SLC22A5 |
| CCND1 |
| IL10 |
| NFE2L2 |
| CXCL8 |
| CYP21A2 |
| FMO3 |
| ABCC8 |
| PIK3CA |
| ACSM2A |
| ACACA |
| CFTR |
| DDC |
| GAMT |
| ACAD9 |
| F2 |
| ADRB2 |
| FABP2 |
| CDKN1A |
| AMPD1 |
| TFR2 |
| CYP11A1 |
| REN |
| NPY |
| SI |
| ODC1 |
| PYGM |
| HMOX1 |
| DHCR7 |
| TH |
| PPIG |
| GLUL |
| CYP11B2 |
| STAR |
| MCEE |
| ARSA |
| DLD |
| KRAS |
| MT-ND1 |
| CALCA |
| ALDH4A1 |
| B2M |
| ABCC2 |
| UGT1A3 |
| BHMT |
| APP |
| ALDH3A2 |
| EHHADH |
| AHR |
| HIBCH |
| ACAT1 |
| CUBN |
| MIR21 |
| CASP8 |
| CTNNB1 |
| FABP4 |
| PNPLA3 |
| TTR |
| IGFBP3 |
| DYRK1B |
| NAMPT |
| SLC25A20 |
| HACD3 |
| FOS |
| IGFBP1 |
| NR3C2 |
| PDK4 |
| FGF21 |
| MAPK8 |
| GPLD1 |
| GLUD1 |
| ALPP |
| GAA |
| GAPDH |
| IGF1R |
| BAX |
| CYCS |
| TPI1 |
| NAGS |
| AKR1A1 |
| ALOX5 |
| SLC4A1 |
| HDAC1 |
| CYP3A7 |
| ALDH7A1 |
| GSR |
| BCKDHA |
| MAOA |
| CYP11B1 |
| MC4R |
| TNFSF11 |
| ACAT2 |
| ECHS1 |
| TNFRSF11B |
| SRD5A2 |
| JUN |
| PTPN1 |
| IGF2 |
| EPHX2 |
| GH1 |
| SCD |
| CYP4F2 |
| APOC2 |
| UGT1A |
| ABCD1 |
| FFAR2 |
| ANGPTL4 |
| UCP1 |
| MVK |
| GLS |
| MTOR |
| SERPINA1 |
| SUCLG1 |
| SP1 |
| SHMT1 |
| SREBF2 |
| SOD2 |
| HK1 |
| AKT2 |
| ACAD8 |
| DGAT1 |
| SERPINA3 |
| TCN2 |
| PLTP |
| ABCC1 |
| TFRC |
| PRL |
| NAGLU |
| PEPD |
| RYR1 |
| CDKN2A |
| DNMT1 |
| ALDH1B1 |
| NR1I3 |
| ABCG2 |
| IL18 |
| SLC9A3 |
| LIPA |
| TYMP |
| BRCA1 |
| ALDH18A1 |
| GNMT |
| RRM2B |
| MT-ND5 |
| SPP1 |
| SLC25A15 |
| ZFP36L1 |
| BDNF |
| TLR4 |
| MIR143 |
| TKT |
| MT-ND6 |
| VEGFA |
| LPA |
| MAPK14 |
| FAS |
| ACO1 |
| PKM |
| SLC52A2 |
| CDKN3 |
| ACADSB |
| ADIPOR2 |
| UGT2B7 |
| CYP7B1 |
| EP300 |
| GLP1R |
| CRAT |
| RB1 |
| GSTA1 |
| GLA |
| SLC6A8 |
| ACADL |
| ICAM1 |
| SRD5A1 |
| OAT |
| ALDH1A1 |
| SOAT1 |
| SLC12A1 |
| CTSD |
| EGF |
| GCLC |
| ABCB11 |
| NAT1 |
| NPC1L1 |
| SLC52A1 |
| UROC1 |
| PYY |
| NR1H3 |
| BCL2L1 |
| PDP1 |
| SCNN1G |
| SCNN1B |
| COG2 |
| DBH |
| CYP2A13 |
| AOX1 |
| GUSB |
| AKR1C3 |
| PLA2G6 |
| FGFR1 |
| PIK3C2A |
| CDK2 |
| JAK2 |
| PARP1 |
| HDAC2 |
| VCAM1 |
| MT-ND4 |
| MAPK10 |
| STAT1 |
| PCSK1 |
| PNLIP |
| CDK1 |
| ALOX12 |
| DBT |
| ATM |
| VIM |
| GPX1 |
| DCXR |
| FFAR3 |
| HRAS |
| MAOB |
| FBN1 |
| ACSF3 |
| SUCLA2 |
| CD44 |
| ALAS2 |
| LBR |
| BCKDK |
| BRCA2 |
| AGPAT2 |
| CAV1 |
| OPLAH |
| TALDO1 |
| AFP |
| GCH1 |
| CA2 |
| SCAP |
| ERBB2 |
| HSPA4 |
| HSPA8 |
| APC |
| IREB2 |
| SLC6A3 |
| CREBBP |
| HSP90AA1 |
| SLC5A2 |
| NOS2 |
| TPO |
| LCT |
| ALDH1A3 |
| SNCA |
| SLPI |
| NR5A1 |
| TSHR |
| DECR1 |
| MIR145 |
| SELE |
| EDN1 |
| NFKB1 |
| FECH |
| PEX5 |
| MT-ND2 |
| PIK3CG |
| ACSM5 |
| HCRT |
| HMBS |
| MMP9 |
| PEMT |
| SST |
| TSPO |
| SLC5A1 |
| AASS |
| IL2 |
| KYAT1 |
| AGT |
| FABP1 |
| HSD17B1 |
| LEPQTL1 |
| ALAD |
| TPH1 |
| BCAT2 |
| FPGS |
| CREB1 |
| BSCL2 |
| ACOX1 |
| NPPA |
| CCK |
| CPT1B |
| HDAC3 |
| ACSM4 |
| MAPK3 |
| PDK3 |
| GLS2 |
| GHR |
| ANXA5 |
| SLC26A3 |
| GAD1 |
| HP |
| IDH1 |
| HBG1 |
| PHEX |
| MMP1 |
| ACSM6 |
| PTGS1 |
| TERT |
| GSTA2 |
| MMP3 |
| MT-CO3 |
| MME |
| CCNA2 |
| H4C16 |
| HSD3B2 |
| LGALS1 |
| SP3 |
| MGAM |
| PTPN11 |
| GNA11 |
| ALDH1L1 |
| SLC3A1 |
| CASP9 |
| AKR1B1 |
| SIRT6 |
| TNFSF10 |
| MAPT |
| CDKN1B |
| SERPINA6 |
| ZFP36L2 |
| AKR1D1 |
| HBA2 |
| RUNX2 |
| GSTM3 |
| PGR |
| PLA2G2A |
| DSP |
| NTS |
| HSD3B1 |
| OXCT1 |
| MAP2K1 |
| HTT |
| ANPEP |
| HPGD |
| GUCY2C |
| ACSL4 |
| TIMP1 |
| CHAT |
| AMACR |
| AKR7A2 |
| NOS1 |
| PEX6 |
| EGFR |
| CDK4 |
| STAT3 |
| CHKA |
| LIAS |
| GPI |
| XIAP |
| SLC10A1 |
| FXN |
| NNMT |
| IL6R |
| ALDH1A2 |
| CPOX |
| HSPG2 |
| LTC4S |
| SLC52A3 |
| TSHB |
| ATF4 |
| CST3 |
| CDH1 |
| STS |
| HSP90B1 |
| BHMT2 |
| NFKBIA |
| KARS1 |
| RXRA |
| CRH |
| MAT2A |
| NRF1 |
| RET |
| RPS27A |
| BAK1 |
| CSF2 |
| PTHLH |
| RARA |
| LOX |
| TXNIP |
| BMP2 |
| FASLG |
| AS3MT |
| ACP1 |
| CACNA1S |
| MIR106B |
| ACHE |
| PDHB |
| SMN1 |
| DDIT3 |
| DRD2 |
| HMGA1 |
| ACLY |
| GSK3B |
| GNRH1 |
| TGFA |
| LRP1 |
| DAO |
| ESR2 |
| HSPA5 |
| BRF1 |
| CRYAA |
| SLC5A5 |
| ELN |
| VDAC1 |
| CD4 |
| CLU |
| TK2 |
| F5 |
| HNRNPA1 |
| ALDH3B1 |
| TYR |
| NLRP3 |
| ADORA2A |
| AVP |
| IL3 |
| PTS |
| DRD4 |
| DLAT |
| SULT2B1 |
| DNAH8 |
| F9 |
| CCND3 |
| IL1A |
| HSPB1 |
| DHCR24 |
| USF1 |
| SPG11 |
| C1QBP |
| SLC6A4 |
| SLC5A8 |
| PSEN1 |
| HNF1B |
| RAD51 |
| TXN |
| XRCC1 |
| AIFM1 |
| HDAC4 |
| MTAP |
| ABCB4 |
| VWF |
| FUCA1 |
| PLAT |
| BAAT |
| GPAM |
| ALPG |
| HLA-A |
| ALOX15 |
| FOXA2 |
| PLAU |
| IL5 |
| TCN1 |
| SOAT2 |
| MECP2 |
| SMAD3 |
| CD40 |
| GPHN |
| GFAP |
| EIF2AK3 |
| FDFT1 |
| BRAF |
| SLC27A1 |
| SCP2 |
| XRCC3 |
| ITGB2 |
| NDUFAF4 |
| KLK3 |
| SHC1 |
| TG |
| PDX1 |
| SLC7A5 |
| ITGAM |
| MMP2 |
| CEBPA |
| CSF1 |
| APOH |
| SRC |
| HDAC8 |
| ALDH3B2 |
| ARNT |
| SERPINC1 |
| MUC1 |
| ADPRH |
| CXCR4 |
| GSN |
| SCN4A |
| MCL1 |
| BSG |
| CDK6 |
| KRT18 |
| MIF |
| EIF2S1 |
| E2F1 |
| TIMP2 |
| RPS6KB1 |
| SETD2 |
| TLR2 |
| GAD2 |
| ABCB7 |
| LDHB |
| SULT1A3 |
| PDGFRB |
| KEAP1 |
| GLO1 |
| MIR203A |
| ACOT4 |
| SLC6A9 |
| FNDC5 |
| THBS1 |
| ARSH |
| ITGA2 |
| CBR1 |
| GHSR |
| NR4A1 |
| RELA |
| TNFRSF1B |
| PCNA |
| RORC |
| NT5E |
| SCN1A |
| FFAR4 |
| CHGA |
| DIO3 |
| FOLH1 |
| PSPH |
| ADH5 |
| MARS1 |
| CD40LG |
| GPX4 |
| AGPAT1 |
| ATF2 |
| F3 |
| IL1RN |
| BBOF1 |
| CFI |
| OXT |
| MLH1 |
| TK1 |
| DUSP19 |
| KLF4 |
| TRPV6 |
| KAT5 |
| ACSL1 |
| HCAR2 |
| LGALS3 |
| MGMT |
| GSTT2 |
| CACNA1A |
| GSTA4 |
| CTSG |
| COQ2 |
| COQ4 |
| SPHK2 |
| ABHD2 |
| GATA6 |
| FOLR1 |
| GCLM |
| GAST |
| TUBB |
| GAL |
| FABP3 |
| ANXA2 |
| NOTCH1 |
| CGA |
| MDM2 |
| PDK2 |
| ANXA1 |
| AXIN1 |
| DBI |
| CPT1C |
| HTR1A |
| ALDH16A1 |
| AOC1 |
| SMN2 |
| CNDP1 |
| GATA1 |
| BIRC5 |
| IFNA1 |
| CSN1S1 |
| IFI27 |
| GIP |
| ENO1 |
| DNMT3B |
| FN1 |
| ADAMTSL1 |
| NGF |
| CAV3 |
| HDC |
| SLCO1A2 |
| BLVRB |
| PDHA2 |
| THPO |
| SLC5A4 |
| RUNX1 |
| DHRS9 |
| SLCO1B3 |
| IL4I1 |
| ELANE |
| PTK2 |
| THBD |
| TXNRD2 |
| CSNK2A1 |
| AQP2 |
| ACOT1 |
| CSF3 |
| RAF1 |
| NPPB |
| ACOT11 |
| ALOX15B |
| NFS1 |
| SELP |
| SOD3 |
| PDSS2 |
| ANO5 |
| VIP |
| CD14 |
| CCNB1 |
| GSTM2 |
| IGFBP2 |
| CTLA4 |
| VAPB |
| PIK3CB |
| MC3R |
| HTR2C |
| NKX2-5 |
| PRKACA |
| SLC16A4 |
| ALPI |
| OPRM1 |
| ACOT8 |
| ALAS1 |
| P4HB |
| COQ9 |
| GABRA1 |
| SCG5 |
| KIT |
| HDAC5 |
| ATOX1 |
| SLC22A12 |
| FABP12 |
| GNPAT |
| CKB |
| DGAT2 |
| KRT14 |
| HMGB1 |
| PARK7 |
| HSPA1A |
| HBG2 |
| GCGR |
| IRF1 |
| ACSL6 |
| ASMT |
| UGT2B4 |
| BCAT1 |
| SOCS3 |
| IGFBP4 |
| GABBR1 |
| ABO |
| CCR5 |
| YY1 |
| HDAC6 |
| IL4 |
| APBB1 |
| PNMT |
| CEBPB |
| KRT8 |
| STX1A |
| LPCAT1 |
| KCNH2 |
| NCOA1 |
| GRIN1 |
| CALB2 |
| SDS |
| CD55 |
| PINK1 |
| ACSF2 |
| MGST1 |
| NCOR1 |
| GSK3A |
| PDSS1 |
| PRLR |
| CDX2 |
| SPARC |
| GRP |
| HTR2A |
| PRKCA |
| CLCN7 |
| RAC1 |
| BDH2 |
| LNPEP |
| STAT5A |
| PLAUR |
| TACR1 |
| GABRG2 |
| AADAT |
| GFER |
| OXA1L |

**Additional file 3**

**Supplementary Tables 2** Information of TCGA-DEGs between the colorectal cancer (CRC) and normal groups

**Additional file 4**

**Supplementary Tables 3** Information of GEO-DEGs between the CRC and normal groups

**Additional file 5**

**Supplementary Tables 4** Gene Ontology (GO) annotation of DE-BMGs

**Additional file 6**

**Supplementary Tables 5** Kyoto Encyclopedia of Genes and Genomes (KEGG) annotation of DE-BMGs

| **ID** | **Description** | **GeneRatio** | **BgRatio** | **pvalue** | **p.adjust** | **qvalue** | **geneID** | **Count** |
| --- | --- | --- | --- | --- | --- | --- | --- | --- |
| hsa05219 | Bladder cancer | 6/59 | 41/8228 | 3.88E-07 | 6.67E-05 | 5.35E-05 | CCND1/MYC/MMP1/VEGFA/CXCL8/MMP9 | 6 |
| hsa03320 | PPAR signaling pathway | 5/59 | 75/8228 | 0.000188 | 0.016136 | 0.012937 | MMP1/SCD/CD36/FABP1/FABP4 | 5 |
| hsa04976 | Bile secretion | 5/59 | 89/8228 | 0.000418 | 0.018466 | 0.014805 | ABCG2/CA2/SLCO1B3/ABCB1/UGT1A1 | 5 |
| hsa05144 | Malaria | 4/59 | 50/8228 | 0.000429 | 0.018466 | 0.014805 | CXCL8/CD36/HBB/HBA2 | 4 |

**Additional file 7**

**Supplementary Tables 6** Information of DE-miRNAs between the CRC and normal groups

**Additional file 8**

**Supplementary Tables 7** Information of DE-lncRNAs between the CRC and normal groups

**Additional file 9**

**Supplementary Tables 8** Information of lncRNA-miRNA-mRNA network

| **miRNA** | **lncRNA** | **mRNA** |
| --- | --- | --- |
| hsa-miR-1270 | SNHG12 | MYC |
| hsa-miR-1270 | AC133785.1 | MYC |
| hsa-miR-1270 | AC016831.1 | MYC |
| hsa-miR-1270 | EXTL3-AS1 | MYC |
| hsa-miR-1270 | AC100821.2 | MYC |
| hsa-miR-1270 | KCNQ1OT1 | MYC |
| hsa-miR-1270 | LINC00958 | MYC |
| hsa-miR-1270 | MALAT1 | MYC |
| hsa-miR-1270 | HELLPAR | MYC |
| hsa-miR-1270 | AC026362.1 | MYC |
| hsa-miR-1270 | SSTR5-AS1 | MYC |
| hsa-miR-1270 | AL031710.2 | MYC |
| hsa-miR-1270 | CRNDE | MYC |
| hsa-miR-1270 | AC092127.1 | MYC |
| hsa-miR-1270 | AC011933.2 | MYC |
| hsa-miR-1270 | AC007785.3 | MYC |
| hsa-miR-1270 | UCKL1-AS1 | MYC |
| hsa-miR-1295a | SLC9A3-AS1 | CXCL8 |
| hsa-miR-1295a | AC092171.3 | CXCL8 |
| hsa-miR-1295a | MMP25-AS1 | CXCL8 |
| hsa-miR-346 | SNHG3 | VEGFA |
| hsa-miR-346 | SNHG3 | VEGFA |
| hsa-miR-346 | SNHG3 | VEGFA |
| hsa-miR-346 | SNHG3 | VEGFA |
| hsa-miR-346 | SNHG3 | VEGFA |
| hsa-miR-346 | SNHG3 | VEGFA |
| hsa-miR-346 | SNHG3 | VEGFA |
| hsa-miR-346 | SNHG3 | VEGFA |
| hsa-miR-346 | SNHG3 | VEGFA |
| hsa-miR-346 | SNHG3 | VEGFA |
| hsa-miR-346 | SNHG3 | VEGFA |
| hsa-miR-346 | SNHG3 | VEGFA |
| hsa-miR-346 | SNHG3 | VEGFA |
| hsa-miR-346 | SNHG3 | VEGFA |
| hsa-miR-346 | SNHG3 | VEGFA |
| hsa-miR-346 | SNHG3 | VEGFA |
| hsa-miR-346 | SNHG3 | VEGFA |
| hsa-miR-346 | SNHG3 | VEGFA |
| hsa-miR-346 | LINC01170 | VEGFA |
| hsa-miR-346 | LINC01170 | VEGFA |
| hsa-miR-346 | LINC01170 | VEGFA |
| hsa-miR-346 | LINC01170 | VEGFA |
| hsa-miR-346 | LINC01170 | VEGFA |
| hsa-miR-346 | LINC01170 | VEGFA |
| hsa-miR-346 | LINC01170 | VEGFA |
| hsa-miR-346 | LINC01170 | VEGFA |
| hsa-miR-346 | LINC01170 | VEGFA |
| hsa-miR-346 | LINC01170 | VEGFA |
| hsa-miR-346 | LINC01170 | VEGFA |
| hsa-miR-346 | LINC01170 | VEGFA |
| hsa-miR-346 | LINC01170 | VEGFA |
| hsa-miR-346 | LINC01170 | VEGFA |
| hsa-miR-346 | LINC01170 | VEGFA |
| hsa-miR-346 | LINC01170 | VEGFA |
| hsa-miR-346 | LINC01170 | VEGFA |
| hsa-miR-346 | LINC01170 | VEGFA |
| hsa-miR-346 | PRR7-AS1 | VEGFA |
| hsa-miR-346 | PRR7-AS1 | VEGFA |
| hsa-miR-346 | PRR7-AS1 | VEGFA |
| hsa-miR-346 | PRR7-AS1 | VEGFA |
| hsa-miR-346 | PRR7-AS1 | VEGFA |
| hsa-miR-346 | PRR7-AS1 | VEGFA |
| hsa-miR-346 | PRR7-AS1 | VEGFA |
| hsa-miR-346 | PRR7-AS1 | VEGFA |
| hsa-miR-346 | PRR7-AS1 | VEGFA |
| hsa-miR-346 | PRR7-AS1 | VEGFA |
| hsa-miR-346 | PRR7-AS1 | VEGFA |
| hsa-miR-346 | PRR7-AS1 | VEGFA |
| hsa-miR-346 | PRR7-AS1 | VEGFA |
| hsa-miR-346 | PRR7-AS1 | VEGFA |
| hsa-miR-346 | PRR7-AS1 | VEGFA |
| hsa-miR-346 | PRR7-AS1 | VEGFA |
| hsa-miR-346 | PRR7-AS1 | VEGFA |
| hsa-miR-346 | PRR7-AS1 | VEGFA |
| hsa-miR-346 | SNHG15 | VEGFA |
| hsa-miR-346 | SNHG15 | VEGFA |
| hsa-miR-346 | SNHG15 | VEGFA |
| hsa-miR-346 | SNHG15 | VEGFA |
| hsa-miR-346 | SNHG15 | VEGFA |
| hsa-miR-346 | SNHG15 | VEGFA |
| hsa-miR-346 | SNHG15 | VEGFA |
| hsa-miR-346 | SNHG15 | VEGFA |
| hsa-miR-346 | SNHG15 | VEGFA |
| hsa-miR-346 | SNHG15 | VEGFA |
| hsa-miR-346 | SNHG15 | VEGFA |
| hsa-miR-346 | SNHG15 | VEGFA |
| hsa-miR-346 | SNHG15 | VEGFA |
| hsa-miR-346 | SNHG15 | VEGFA |
| hsa-miR-346 | SNHG15 | VEGFA |
| hsa-miR-346 | SNHG15 | VEGFA |
| hsa-miR-346 | SNHG15 | VEGFA |
| hsa-miR-346 | SNHG15 | VEGFA |
| hsa-miR-346 | DLX6-AS1 | VEGFA |
| hsa-miR-346 | DLX6-AS1 | VEGFA |
| hsa-miR-346 | DLX6-AS1 | VEGFA |
| hsa-miR-346 | DLX6-AS1 | VEGFA |
| hsa-miR-346 | DLX6-AS1 | VEGFA |
| hsa-miR-346 | DLX6-AS1 | VEGFA |
| hsa-miR-346 | DLX6-AS1 | VEGFA |
| hsa-miR-346 | DLX6-AS1 | VEGFA |
| hsa-miR-346 | DLX6-AS1 | VEGFA |
| hsa-miR-346 | DLX6-AS1 | VEGFA |
| hsa-miR-346 | DLX6-AS1 | VEGFA |
| hsa-miR-346 | DLX6-AS1 | VEGFA |
| hsa-miR-346 | DLX6-AS1 | VEGFA |
| hsa-miR-346 | DLX6-AS1 | VEGFA |
| hsa-miR-346 | DLX6-AS1 | VEGFA |
| hsa-miR-346 | DLX6-AS1 | VEGFA |
| hsa-miR-346 | DLX6-AS1 | VEGFA |
| hsa-miR-346 | DLX6-AS1 | VEGFA |
| hsa-miR-346 | STAG3L5P-PVRIG2P-PILRB | VEGFA |
| hsa-miR-346 | STAG3L5P-PVRIG2P-PILRB | VEGFA |
| hsa-miR-346 | STAG3L5P-PVRIG2P-PILRB | VEGFA |
| hsa-miR-346 | STAG3L5P-PVRIG2P-PILRB | VEGFA |
| hsa-miR-346 | STAG3L5P-PVRIG2P-PILRB | VEGFA |
| hsa-miR-346 | STAG3L5P-PVRIG2P-PILRB | VEGFA |
| hsa-miR-346 | STAG3L5P-PVRIG2P-PILRB | VEGFA |
| hsa-miR-346 | STAG3L5P-PVRIG2P-PILRB | VEGFA |
| hsa-miR-346 | STAG3L5P-PVRIG2P-PILRB | VEGFA |
| hsa-miR-346 | STAG3L5P-PVRIG2P-PILRB | VEGFA |
| hsa-miR-346 | STAG3L5P-PVRIG2P-PILRB | VEGFA |
| hsa-miR-346 | STAG3L5P-PVRIG2P-PILRB | VEGFA |
| hsa-miR-346 | STAG3L5P-PVRIG2P-PILRB | VEGFA |
| hsa-miR-346 | STAG3L5P-PVRIG2P-PILRB | VEGFA |
| hsa-miR-346 | STAG3L5P-PVRIG2P-PILRB | VEGFA |
| hsa-miR-346 | STAG3L5P-PVRIG2P-PILRB | VEGFA |
| hsa-miR-346 | STAG3L5P-PVRIG2P-PILRB | VEGFA |
| hsa-miR-346 | STAG3L5P-PVRIG2P-PILRB | VEGFA |
| hsa-miR-346 | AL359636.2 | VEGFA |
| hsa-miR-346 | AL359636.2 | VEGFA |
| hsa-miR-346 | AL359636.2 | VEGFA |
| hsa-miR-346 | AL359636.2 | VEGFA |
| hsa-miR-346 | AL359636.2 | VEGFA |
| hsa-miR-346 | AL359636.2 | VEGFA |
| hsa-miR-346 | AL359636.2 | VEGFA |
| hsa-miR-346 | AL359636.2 | VEGFA |
| hsa-miR-346 | AL359636.2 | VEGFA |
| hsa-miR-346 | AL359636.2 | VEGFA |
| hsa-miR-346 | AL359636.2 | VEGFA |
| hsa-miR-346 | AL359636.2 | VEGFA |
| hsa-miR-346 | AL359636.2 | VEGFA |
| hsa-miR-346 | AL359636.2 | VEGFA |
| hsa-miR-346 | AL359636.2 | VEGFA |
| hsa-miR-346 | AL359636.2 | VEGFA |
| hsa-miR-346 | AL359636.2 | VEGFA |
| hsa-miR-346 | AL359636.2 | VEGFA |
| hsa-miR-346 | H19 | VEGFA |
| hsa-miR-346 | H19 | VEGFA |
| hsa-miR-346 | H19 | VEGFA |
| hsa-miR-346 | H19 | VEGFA |
| hsa-miR-346 | H19 | VEGFA |
| hsa-miR-346 | H19 | VEGFA |
| hsa-miR-346 | H19 | VEGFA |
| hsa-miR-346 | H19 | VEGFA |
| hsa-miR-346 | H19 | VEGFA |
| hsa-miR-346 | H19 | VEGFA |
| hsa-miR-346 | H19 | VEGFA |
| hsa-miR-346 | H19 | VEGFA |
| hsa-miR-346 | H19 | VEGFA |
| hsa-miR-346 | H19 | VEGFA |
| hsa-miR-346 | H19 | VEGFA |
| hsa-miR-346 | H19 | VEGFA |
| hsa-miR-346 | H19 | VEGFA |
| hsa-miR-346 | H19 | VEGFA |
| hsa-miR-346 | KCNQ1OT1 | VEGFA |
| hsa-miR-346 | KCNQ1OT1 | VEGFA |
| hsa-miR-346 | KCNQ1OT1 | VEGFA |
| hsa-miR-346 | KCNQ1OT1 | VEGFA |
| hsa-miR-346 | KCNQ1OT1 | VEGFA |
| hsa-miR-346 | KCNQ1OT1 | VEGFA |
| hsa-miR-346 | KCNQ1OT1 | VEGFA |
| hsa-miR-346 | KCNQ1OT1 | VEGFA |
| hsa-miR-346 | KCNQ1OT1 | VEGFA |
| hsa-miR-346 | KCNQ1OT1 | VEGFA |
| hsa-miR-346 | KCNQ1OT1 | VEGFA |
| hsa-miR-346 | KCNQ1OT1 | VEGFA |
| hsa-miR-346 | KCNQ1OT1 | VEGFA |
| hsa-miR-346 | KCNQ1OT1 | VEGFA |
| hsa-miR-346 | KCNQ1OT1 | VEGFA |
| hsa-miR-346 | KCNQ1OT1 | VEGFA |
| hsa-miR-346 | KCNQ1OT1 | VEGFA |
| hsa-miR-346 | KCNQ1OT1 | VEGFA |
| hsa-miR-346 | MALAT1 | VEGFA |
| hsa-miR-346 | MALAT1 | VEGFA |
| hsa-miR-346 | MALAT1 | VEGFA |
| hsa-miR-346 | MALAT1 | VEGFA |
| hsa-miR-346 | MALAT1 | VEGFA |
| hsa-miR-346 | MALAT1 | VEGFA |
| hsa-miR-346 | MALAT1 | VEGFA |
| hsa-miR-346 | MALAT1 | VEGFA |
| hsa-miR-346 | MALAT1 | VEGFA |
| hsa-miR-346 | MALAT1 | VEGFA |
| hsa-miR-346 | MALAT1 | VEGFA |
| hsa-miR-346 | MALAT1 | VEGFA |
| hsa-miR-346 | MALAT1 | VEGFA |
| hsa-miR-346 | MALAT1 | VEGFA |
| hsa-miR-346 | MALAT1 | VEGFA |
| hsa-miR-346 | MALAT1 | VEGFA |
| hsa-miR-346 | MALAT1 | VEGFA |
| hsa-miR-346 | MALAT1 | VEGFA |
| hsa-miR-346 | AL161891.1 | VEGFA |
| hsa-miR-346 | AL161891.1 | VEGFA |
| hsa-miR-346 | AL161891.1 | VEGFA |
| hsa-miR-346 | AL161891.1 | VEGFA |
| hsa-miR-346 | AL161891.1 | VEGFA |
| hsa-miR-346 | AL161891.1 | VEGFA |
| hsa-miR-346 | AL161891.1 | VEGFA |
| hsa-miR-346 | AL161891.1 | VEGFA |
| hsa-miR-346 | AL161891.1 | VEGFA |
| hsa-miR-346 | AL161891.1 | VEGFA |
| hsa-miR-346 | AL161891.1 | VEGFA |
| hsa-miR-346 | AL161891.1 | VEGFA |
| hsa-miR-346 | AL161891.1 | VEGFA |
| hsa-miR-346 | AL161891.1 | VEGFA |
| hsa-miR-346 | AL161891.1 | VEGFA |
| hsa-miR-346 | AL161891.1 | VEGFA |
| hsa-miR-346 | AL161891.1 | VEGFA |
| hsa-miR-346 | AL161891.1 | VEGFA |
| hsa-miR-346 | VASH1-AS1 | VEGFA |
| hsa-miR-346 | VASH1-AS1 | VEGFA |
| hsa-miR-346 | VASH1-AS1 | VEGFA |
| hsa-miR-346 | VASH1-AS1 | VEGFA |
| hsa-miR-346 | VASH1-AS1 | VEGFA |
| hsa-miR-346 | VASH1-AS1 | VEGFA |
| hsa-miR-346 | VASH1-AS1 | VEGFA |
| hsa-miR-346 | VASH1-AS1 | VEGFA |
| hsa-miR-346 | VASH1-AS1 | VEGFA |
| hsa-miR-346 | VASH1-AS1 | VEGFA |
| hsa-miR-346 | VASH1-AS1 | VEGFA |
| hsa-miR-346 | VASH1-AS1 | VEGFA |
| hsa-miR-346 | VASH1-AS1 | VEGFA |
| hsa-miR-346 | VASH1-AS1 | VEGFA |
| hsa-miR-346 | VASH1-AS1 | VEGFA |
| hsa-miR-346 | VASH1-AS1 | VEGFA |
| hsa-miR-346 | VASH1-AS1 | VEGFA |
| hsa-miR-346 | VASH1-AS1 | VEGFA |
| hsa-miR-346 | LINC00922 | VEGFA |
| hsa-miR-346 | LINC00922 | VEGFA |
| hsa-miR-346 | LINC00922 | VEGFA |
| hsa-miR-346 | LINC00922 | VEGFA |
| hsa-miR-346 | LINC00922 | VEGFA |
| hsa-miR-346 | LINC00922 | VEGFA |
| hsa-miR-346 | LINC00922 | VEGFA |
| hsa-miR-346 | LINC00922 | VEGFA |
| hsa-miR-346 | LINC00922 | VEGFA |
| hsa-miR-346 | LINC00922 | VEGFA |
| hsa-miR-346 | LINC00922 | VEGFA |
| hsa-miR-346 | LINC00922 | VEGFA |
| hsa-miR-346 | LINC00922 | VEGFA |
| hsa-miR-346 | LINC00922 | VEGFA |
| hsa-miR-346 | LINC00922 | VEGFA |
| hsa-miR-346 | LINC00922 | VEGFA |
| hsa-miR-346 | LINC00922 | VEGFA |
| hsa-miR-346 | LINC00922 | VEGFA |
| hsa-miR-346 | AC003101.2 | VEGFA |
| hsa-miR-346 | AC003101.2 | VEGFA |
| hsa-miR-346 | AC003101.2 | VEGFA |
| hsa-miR-346 | AC003101.2 | VEGFA |
| hsa-miR-346 | AC003101.2 | VEGFA |
| hsa-miR-346 | AC003101.2 | VEGFA |
| hsa-miR-346 | AC003101.2 | VEGFA |
| hsa-miR-346 | AC003101.2 | VEGFA |
| hsa-miR-346 | AC003101.2 | VEGFA |
| hsa-miR-346 | AC003101.2 | VEGFA |
| hsa-miR-346 | AC003101.2 | VEGFA |
| hsa-miR-346 | AC003101.2 | VEGFA |
| hsa-miR-346 | AC003101.2 | VEGFA |
| hsa-miR-346 | AC003101.2 | VEGFA |
| hsa-miR-346 | AC003101.2 | VEGFA |
| hsa-miR-346 | AC003101.2 | VEGFA |
| hsa-miR-346 | AC003101.2 | VEGFA |
| hsa-miR-346 | AC003101.2 | VEGFA |
| hsa-miR-346 | AC010336.1 | VEGFA |
| hsa-miR-346 | AC010336.1 | VEGFA |
| hsa-miR-346 | AC010336.1 | VEGFA |
| hsa-miR-346 | AC010336.1 | VEGFA |
| hsa-miR-346 | AC010336.1 | VEGFA |
| hsa-miR-346 | AC010336.1 | VEGFA |
| hsa-miR-346 | AC010336.1 | VEGFA |
| hsa-miR-346 | AC010336.1 | VEGFA |
| hsa-miR-346 | AC010336.1 | VEGFA |
| hsa-miR-346 | AC010336.1 | VEGFA |
| hsa-miR-346 | AC010336.1 | VEGFA |
| hsa-miR-346 | AC010336.1 | VEGFA |
| hsa-miR-346 | AC010336.1 | VEGFA |
| hsa-miR-346 | AC010336.1 | VEGFA |
| hsa-miR-346 | AC010336.1 | VEGFA |
| hsa-miR-346 | AC010336.1 | VEGFA |
| hsa-miR-346 | AC010336.1 | VEGFA |
| hsa-miR-346 | AC010336.1 | VEGFA |
| hsa-miR-346 | AC011476.2 | VEGFA |
| hsa-miR-346 | AC011476.2 | VEGFA |
| hsa-miR-346 | AC011476.2 | VEGFA |
| hsa-miR-346 | AC011476.2 | VEGFA |
| hsa-miR-346 | AC011476.2 | VEGFA |
| hsa-miR-346 | AC011476.2 | VEGFA |
| hsa-miR-346 | AC011476.2 | VEGFA |
| hsa-miR-346 | AC011476.2 | VEGFA |
| hsa-miR-346 | AC011476.2 | VEGFA |
| hsa-miR-346 | AC011476.2 | VEGFA |
| hsa-miR-346 | AC011476.2 | VEGFA |
| hsa-miR-346 | AC011476.2 | VEGFA |
| hsa-miR-346 | AC011476.2 | VEGFA |
| hsa-miR-346 | AC011476.2 | VEGFA |
| hsa-miR-346 | AC011476.2 | VEGFA |
| hsa-miR-346 | AC011476.2 | VEGFA |
| hsa-miR-346 | AC011476.2 | VEGFA |
| hsa-miR-346 | AC011476.2 | VEGFA |
| hsa-miR-346 | LINC00896 | VEGFA |
| hsa-miR-346 | LINC00896 | VEGFA |
| hsa-miR-346 | LINC00896 | VEGFA |
| hsa-miR-346 | LINC00896 | VEGFA |
| hsa-miR-346 | LINC00896 | VEGFA |
| hsa-miR-346 | LINC00896 | VEGFA |
| hsa-miR-346 | LINC00896 | VEGFA |
| hsa-miR-346 | LINC00896 | VEGFA |
| hsa-miR-346 | LINC00896 | VEGFA |
| hsa-miR-346 | LINC00896 | VEGFA |
| hsa-miR-346 | LINC00896 | VEGFA |
| hsa-miR-346 | LINC00896 | VEGFA |
| hsa-miR-346 | LINC00896 | VEGFA |
| hsa-miR-346 | LINC00896 | VEGFA |
| hsa-miR-346 | LINC00896 | VEGFA |
| hsa-miR-346 | LINC00896 | VEGFA |
| hsa-miR-346 | LINC00896 | VEGFA |
| hsa-miR-346 | LINC00896 | VEGFA |
| hsa-miR-346 | AL021392.1 | VEGFA |
| hsa-miR-346 | AL021392.1 | VEGFA |
| hsa-miR-346 | AL021392.1 | VEGFA |
| hsa-miR-346 | AL021392.1 | VEGFA |
| hsa-miR-346 | AL021392.1 | VEGFA |
| hsa-miR-346 | AL021392.1 | VEGFA |
| hsa-miR-346 | AL021392.1 | VEGFA |
| hsa-miR-346 | AL021392.1 | VEGFA |
| hsa-miR-346 | AL021392.1 | VEGFA |
| hsa-miR-346 | AL021392.1 | VEGFA |
| hsa-miR-346 | AL021392.1 | VEGFA |
| hsa-miR-346 | AL021392.1 | VEGFA |
| hsa-miR-346 | AL021392.1 | VEGFA |
| hsa-miR-346 | AL021392.1 | VEGFA |
| hsa-miR-346 | AL021392.1 | VEGFA |
| hsa-miR-346 | AL021392.1 | VEGFA |
| hsa-miR-346 | AL021392.1 | VEGFA |
| hsa-miR-346 | AL021392.1 | VEGFA |
| hsa-miR-760 | RUSC1-AS1 | CCND1 |
| hsa-miR-760 | RUSC1-AS1 | CXCL8 |
| hsa-miR-760 | RUSC1-AS1 | CXCL8 |
| hsa-miR-760 | SLC9A3-AS1 | CCND1 |
| hsa-miR-760 | SLC9A3-AS1 | CXCL8 |
| hsa-miR-760 | SLC9A3-AS1 | CXCL8 |
| hsa-miR-760 | AC011379.1 | CCND1 |
| hsa-miR-760 | AC011379.1 | CXCL8 |
| hsa-miR-760 | AC011379.1 | CXCL8 |
| hsa-miR-760 | STAG3L5P-PVRIG2P-PILRB | CCND1 |
| hsa-miR-760 | STAG3L5P-PVRIG2P-PILRB | CXCL8 |
| hsa-miR-760 | STAG3L5P-PVRIG2P-PILRB | CXCL8 |
| hsa-miR-760 | SND1-IT1 | CCND1 |
| hsa-miR-760 | SND1-IT1 | CXCL8 |
| hsa-miR-760 | SND1-IT1 | CXCL8 |
| hsa-miR-760 | LINC00858 | CCND1 |
| hsa-miR-760 | LINC00858 | CXCL8 |
| hsa-miR-760 | LINC00858 | CXCL8 |
| hsa-miR-760 | H19 | CCND1 |
| hsa-miR-760 | H19 | CXCL8 |
| hsa-miR-760 | H19 | CXCL8 |
| hsa-miR-760 | KCNQ1OT1 | CCND1 |
| hsa-miR-760 | KCNQ1OT1 | CXCL8 |
| hsa-miR-760 | KCNQ1OT1 | CXCL8 |
| hsa-miR-760 | SNHG1 | CCND1 |
| hsa-miR-760 | SNHG1 | CXCL8 |
| hsa-miR-760 | SNHG1 | CXCL8 |
| hsa-miR-760 | MALAT1 | CCND1 |
| hsa-miR-760 | MALAT1 | CXCL8 |
| hsa-miR-760 | MALAT1 | CXCL8 |
| hsa-miR-760 | HELLPAR | CCND1 |
| hsa-miR-760 | HELLPAR | CXCL8 |
| hsa-miR-760 | HELLPAR | CXCL8 |
| hsa-miR-760 | AC125616.1 | CCND1 |
| hsa-miR-760 | AC125616.1 | CXCL8 |
| hsa-miR-760 | AC125616.1 | CXCL8 |
| hsa-miR-760 | AC026362.1 | CCND1 |
| hsa-miR-760 | AC026362.1 | CXCL8 |
| hsa-miR-760 | AC026362.1 | CXCL8 |
| hsa-miR-760 | DLEU1 | CCND1 |
| hsa-miR-760 | DLEU1 | CXCL8 |
| hsa-miR-760 | DLEU1 | CXCL8 |
| hsa-miR-760 | AL135999.1 | CCND1 |
| hsa-miR-760 | AL135999.1 | CXCL8 |
| hsa-miR-760 | AL135999.1 | CXCL8 |
| hsa-miR-760 | VASH1-AS1 | CCND1 |
| hsa-miR-760 | VASH1-AS1 | CXCL8 |
| hsa-miR-760 | VASH1-AS1 | CXCL8 |
| hsa-miR-760 | AC145285.6 | CCND1 |
| hsa-miR-760 | AC145285.6 | CXCL8 |
| hsa-miR-760 | AC145285.6 | CXCL8 |
| hsa-miR-760 | LHX1-DT | CCND1 |
| hsa-miR-760 | LHX1-DT | CXCL8 |
| hsa-miR-760 | LHX1-DT | CXCL8 |
| hsa-miR-760 | AC008105.1 | CCND1 |
| hsa-miR-760 | AC008105.1 | CXCL8 |
| hsa-miR-760 | AC008105.1 | CXCL8 |
| hsa-miR-760 | AL121832.3 | CCND1 |
| hsa-miR-760 | AL121832.3 | CXCL8 |
| hsa-miR-760 | AL121832.3 | CXCL8 |
| hsa-miR-760 | LINC00659 | CCND1 |
| hsa-miR-760 | LINC00659 | CXCL8 |
| hsa-miR-760 | LINC00659 | CXCL8 |
| hsa-miR-760 | AJ239328.1 | CCND1 |
| hsa-miR-760 | AJ239328.1 | CXCL8 |
| hsa-miR-760 | AJ239328.1 | CXCL8 |
| hsa-miR-760 | Z82243.1 | CCND1 |
| hsa-miR-760 | Z82243.1 | CXCL8 |
| hsa-miR-760 | Z82243.1 | CXCL8 |
